# Supplementary material for: Infinium Monkeys: Infinium 450K Array for the Cynomolgus macaque (Macaca fascicularis)
Source: PubMed Central journal article supplement (PMC4455772; doi:10.1534/g3.114.010967), 2014-05-08
Supplement: supp_g3.114.010967_010967SI.pdf [file supp_g3.114.010967_010967SI.pdf]

## **Infinium Monkeys: Infinium 450K array for the *Cynomolgus macaque* (*Macaca fascicularis*)**

Mei-Lyn Ong\*, Peck Yean Tan\*, Julia L MacIsaac<sup>§</sup>, Sarah M Mah<sup>§</sup>, Jan Paul Buschdorf\*, Clara Y Cheong\*, Walter Stunkel\*, Louiza Chan\*, Peter D Gluckman\*, Keefe Chng\*, Michael S. Kobor<sup>§</sup>, Michael J Meaney<sup>\*,†</sup>, Joanna D Holbrook\*

\*Singapore Institute of Clinical Sciences (SICS), A\*STAR, Singapore

<sup>§</sup>Centre for Molecular Medicine and Therapeutics, Child and Family Research Institute, University of British Columbia, Canada

<sup>†</sup>Ludmer Centre for Neuroinformatics and Mental Health, Douglas Institute, McGill University, Montreal, Canada

GSE IDs: GSE52944 (Infinium 450K data), GSE53596 (RRBS data)

Corresponding Author:

Joanna Holbrook

Singapore Institute for Clinical Sciences (SICS), Brenner Centre for Molecular Medicine, 30 Medical Drive, Singapore 117609

+65 6407 0688

Joanna\_Holbrook@sics.a-star.edu.sg

**DOI: 10.1534/g3.114.010967**

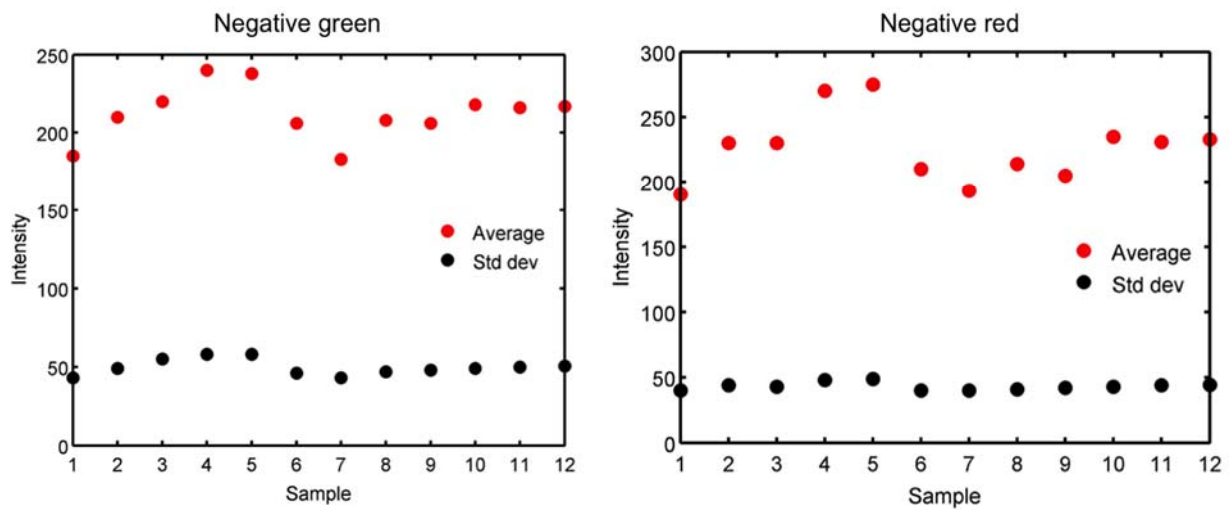

**Figure S1** (a) Average green and red negative control probe intensities with standard deviations for the twelve Infinium 450K data for the *Cynomolgus* macaque muscle tissues.

a

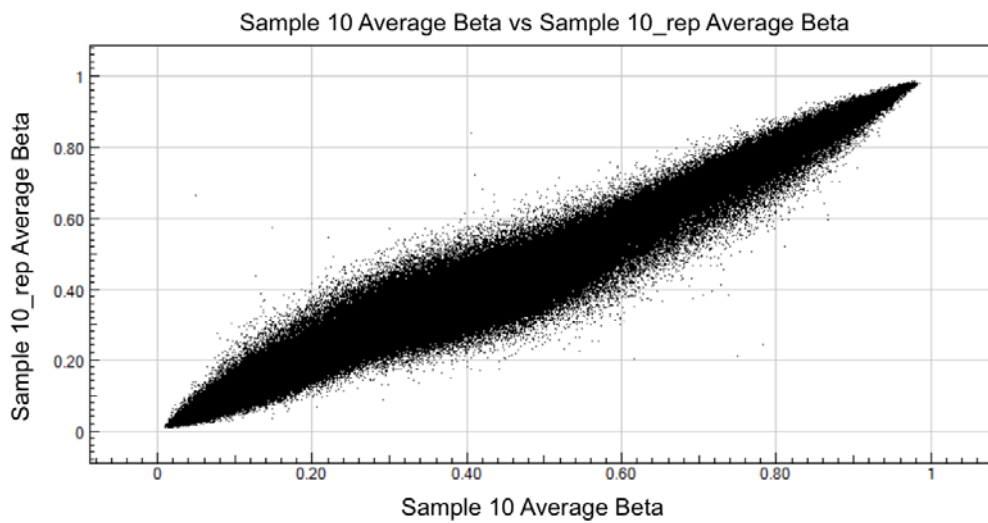

R=0.97

b

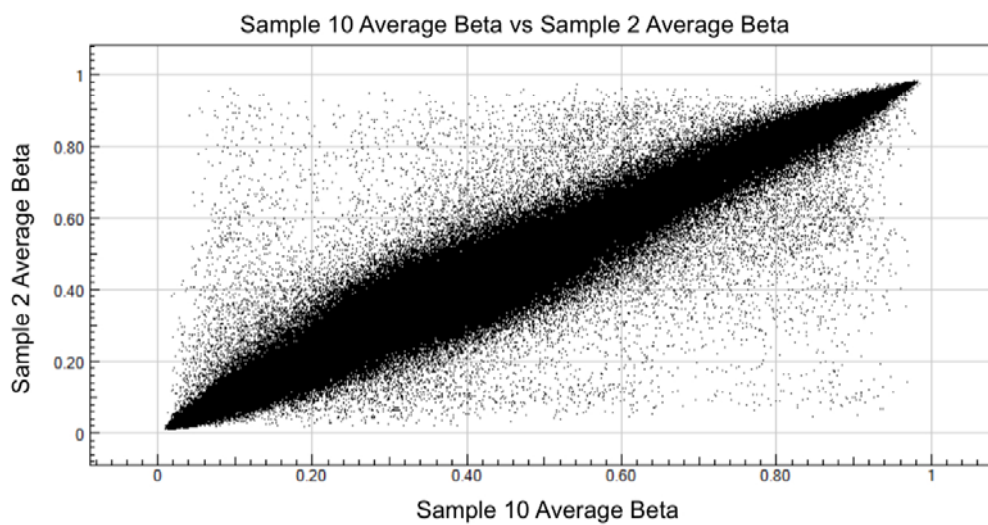

R=0.94

**Figure S2** (a) Scatterplot of Infinium 450K data for *Cynomolgus* macaque muscle sample versus technical replicate of sample. (b) Scatterplot of Infinium 450K data for two independent *Cynomolgus* macaque muscle samples.

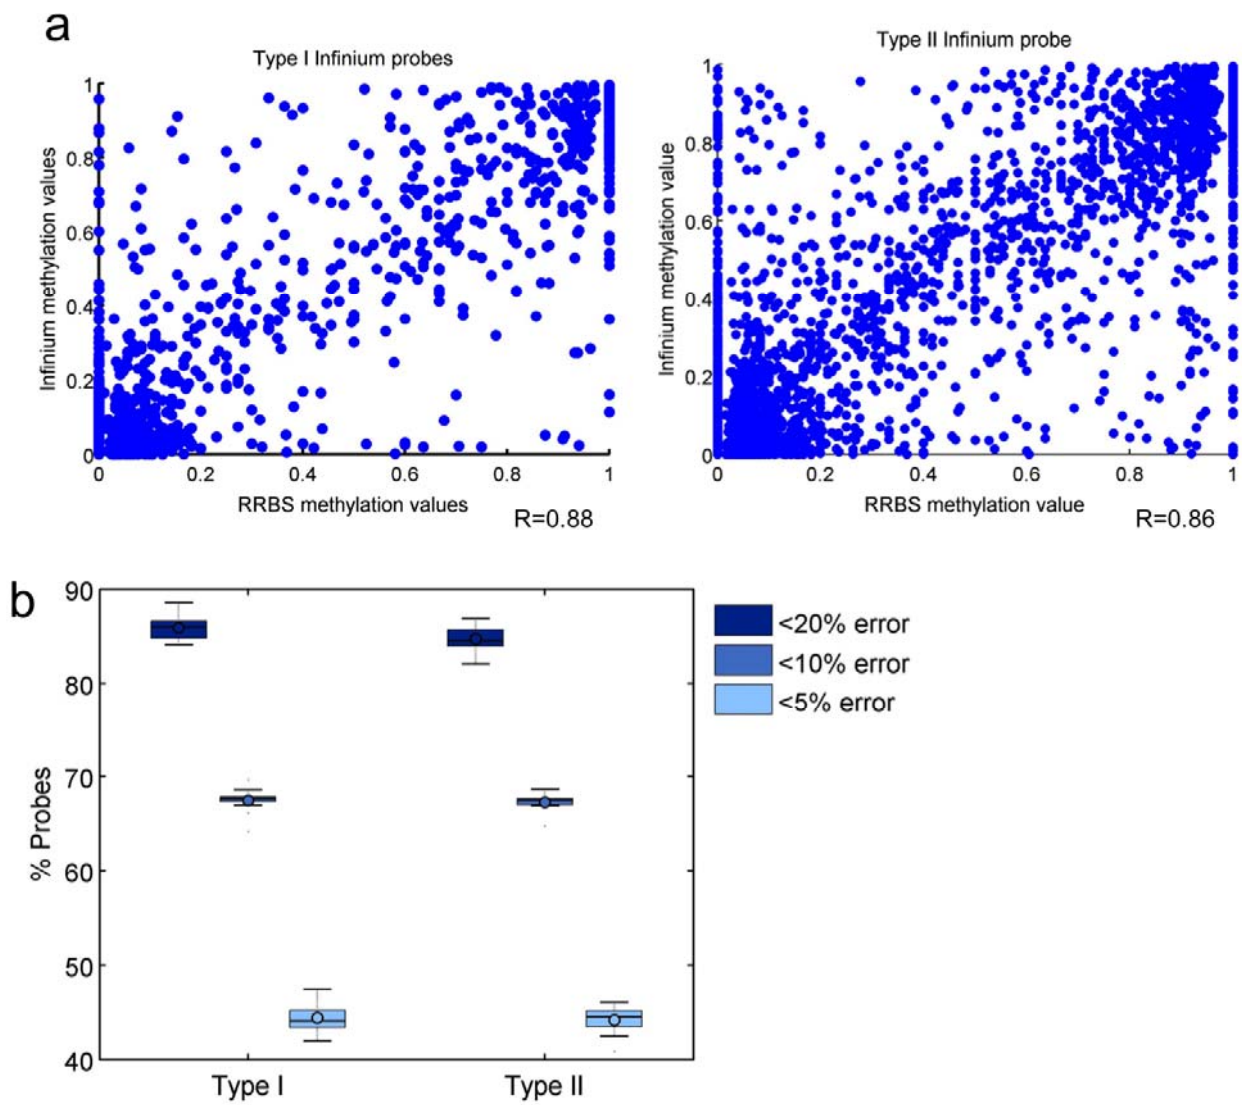

**Figure S3** (a) Scatterplot of Infinium 450K data versus RRBS data for one sample stratified by Infinium type I and type II probes. (b) Percent of probes with varying percent error between RRBS and Infinium data with type I or type II probes.

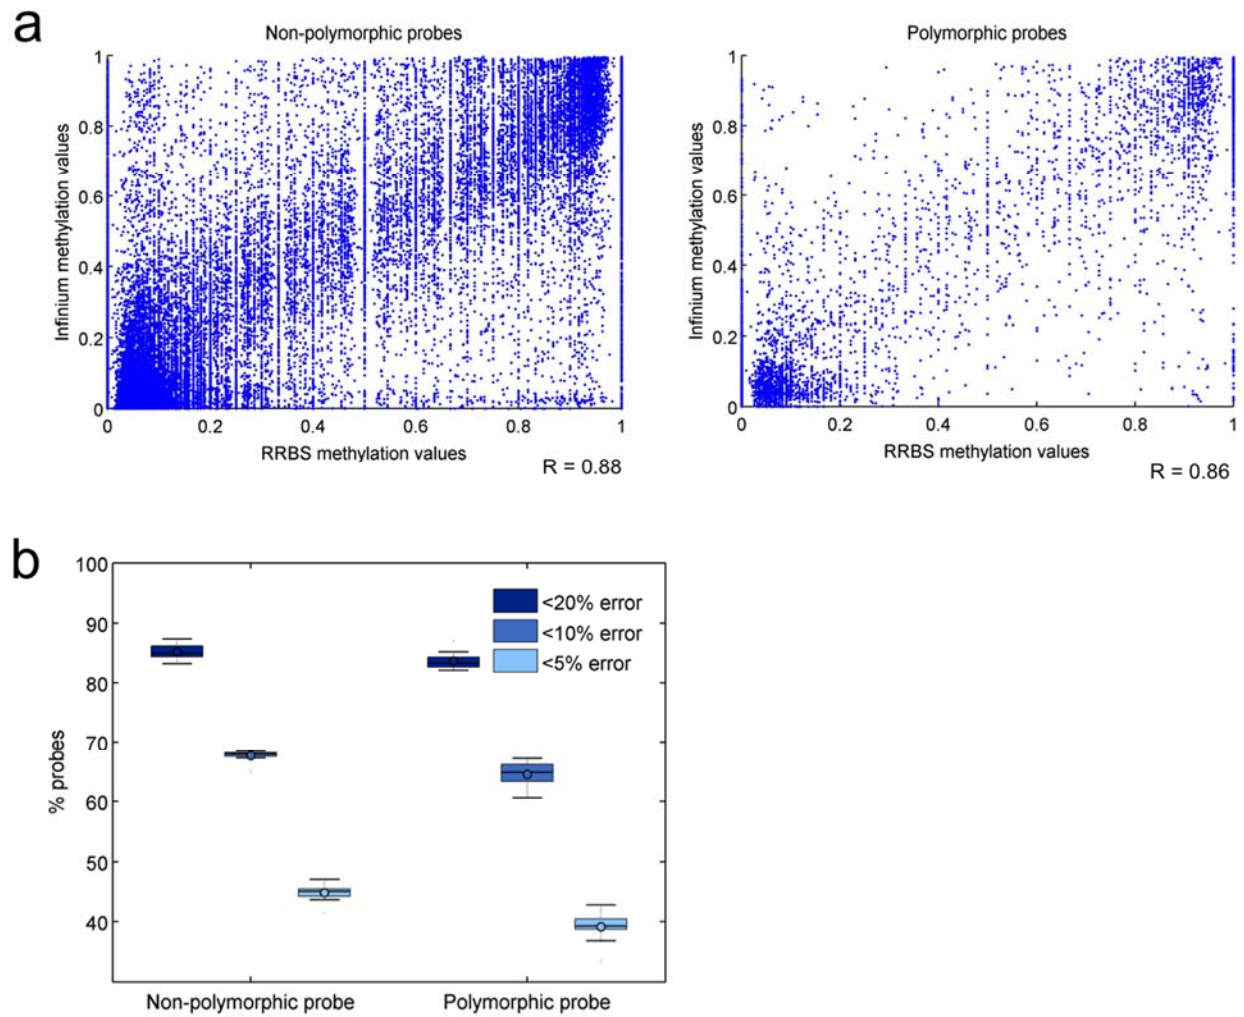

**Figure S4** (a) Scatterplot of Infinium 450K data versus RRBS data for all samples stratified by polymorphic and non-polymorphic probes. (b) Percent of probes with varying percent error between RRBS and Infinium data with non-polymorphic or polymorphic probes.

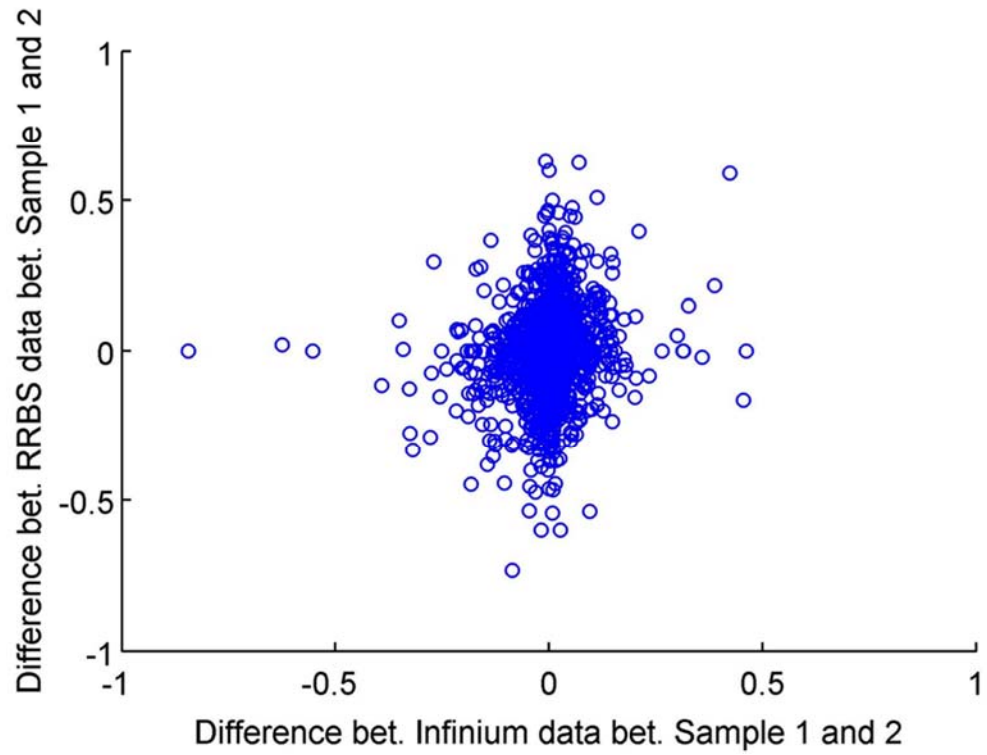

**Figure S5** Scatter plot of inter-individual differences between two samples as measured by the Infinium 450K array or RRBS.

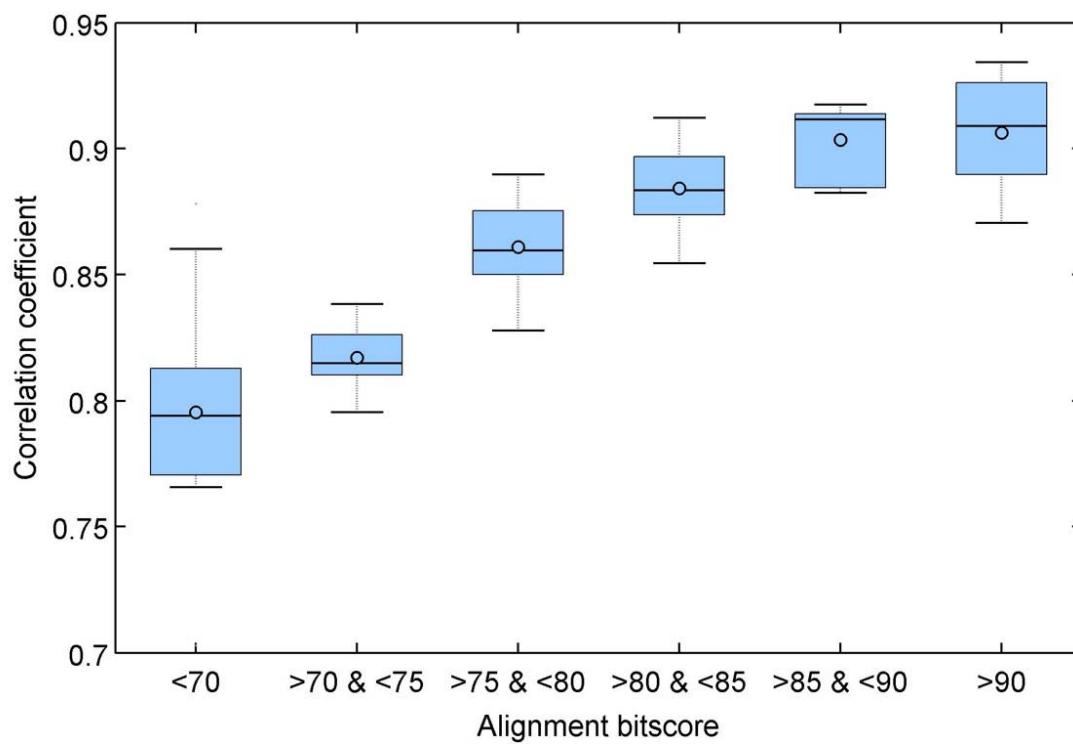

**Figure S6** Correlation of Infinium 450K and RRBS data for selected probes sequences with bitscores in the indicative ranges.

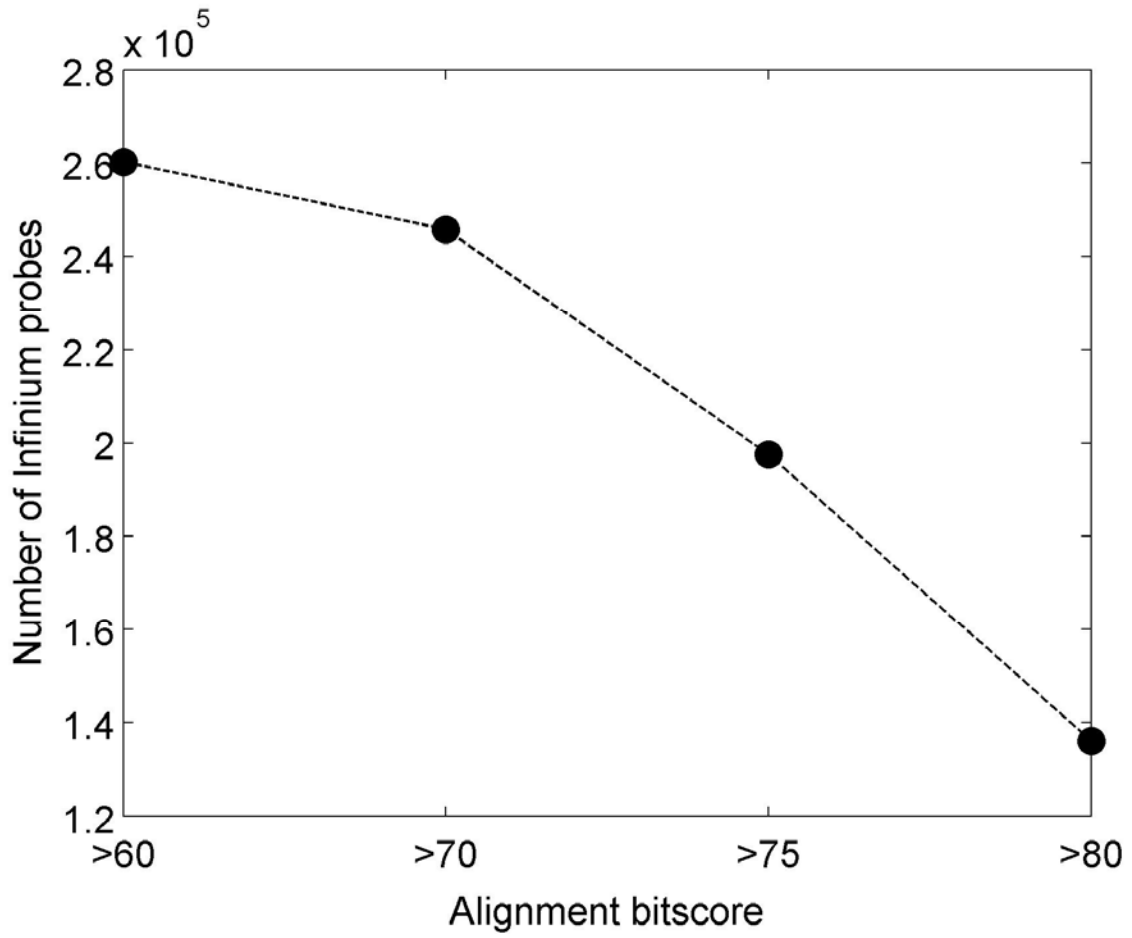

**Figure S7** Number of array probes using different bitscore thresholds.



**Table S1 Per-sample correlation between RRBS and Infinium 450K data and % probes with less than 10% methylation difference between the two technologies stratified across different alignment scores.**

| Alignment score | Sample number       | 1    | 2    | 3    | 4    | 5    | 6    | 7    | 8    | 9    | 10   | 10_rep | 12   |
|-----------------|---------------------|------|------|------|------|------|------|------|------|------|------|--------|------|
| Bit score < 70  | Correlation         | 0.70 | 0.88 | 0.78 | 0.79 | 0.86 | 0.81 | 0.77 | 0.81 | 0.80 | 0.77 | 0.77   | 0.80 |
|                 | % Probes <10% error | 54.7 | 63.6 | 55.7 | 64.0 | 62.1 | 64.5 | 57.8 | 62.5 | 64.3 | 59.2 | 60.0   | 63.9 |
| Bit score > 70  | Correlation         | 0.86 | 0.88 | 0.86 | 0.88 | 0.87 | 0.90 | 0.85 | 0.88 | 0.90 | 0.88 | 0.88   | 0.90 |
|                 | % Probes <10% error | 68.8 | 69.0 | 65.9 | 69.1 | 69.1 | 68.8 | 68.7 | 69.2 | 68.2 | 69.0 | 69.1   | 68.4 |
| Bit score > 80  | Correlation         | 0.88 | 0.90 | 0.88 | 0.91 | 0.88 | 0.92 | 0.88 | 0.90 | 0.92 | 0.90 | 0.90   | 0.92 |
|                 | % Probes <10% error | 70.4 | 69.7 | 66.9 | 70.6 | 70.8 | 70.2 | 71.4 | 70.3 | 69.8 | 70.3 | 71.8   | 69.6 |

**Table S2** Various alignment quality metrics for Type 1 and Type 2 Infinium probes.

| Alignment quality  | Infinium probe |              |
|--------------------|----------------|--------------|
|                    | Type 1         | Type 2       |
| Average % identity | 96.1           | 96.3         |
| Average bitscore   | 81.7           | 81.8         |
| Average E-value    | $3.4e^{-12}$   | $2.6e^{-12}$ |

**File S1**

**Infinium 450K annotation file for *Cynomolgus macaque*.**

Available for download as an Excel file at <http://www.g3journal.org/lookup/suppl/doi:10.1534/g3.114.010967/-/DC1>.
