# Supplementary material for: Infinium Monkeys: Infinium 450K Array for the Cynomolgus macaque (Macaca fascicularis)
Source: PubMed Central journal article supplement (PMC4455772; doi:10.1534/g3.114.010967), 2014-05-08
Supplement: supp_g3.114.010967_FigureS1.pdf [file supp_g3.114.010967_FigureS1.pdf]

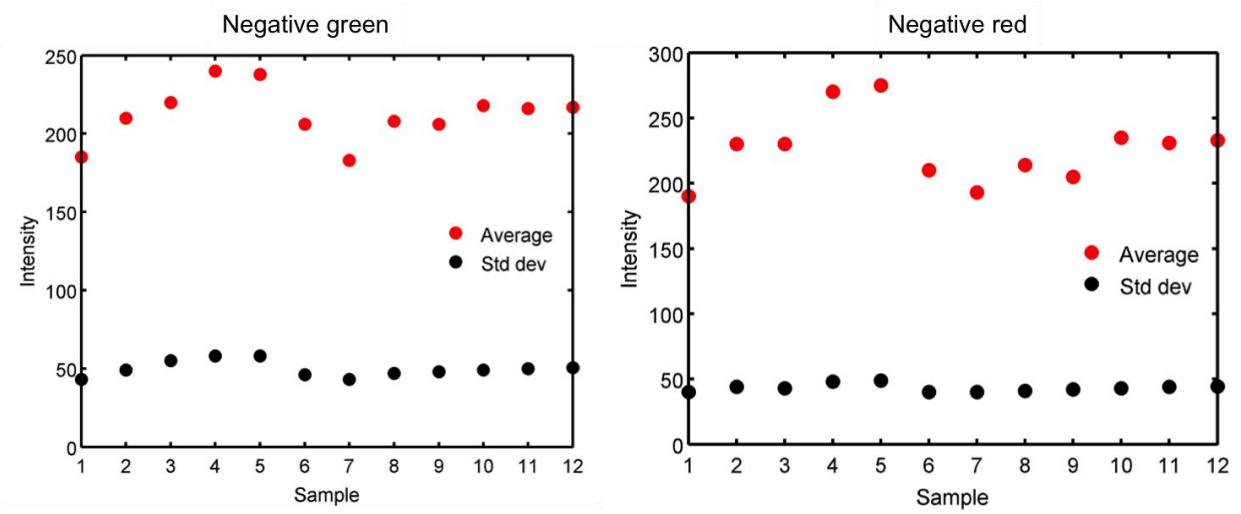

**Figure S1** (a) Average green and red negative control probe intensities with standard deviations for the twelve Infinium 450K data for the *Cynomolgus* macaque muscle tissues.
