# Supplementary material for: Infinium Monkeys: Infinium 450K Array for the Cynomolgus macaque (Macaca fascicularis)
Source: PubMed Central journal article supplement (PMC4455772; doi:10.1534/g3.114.010967), 2014-05-08
Supplement: supp_g3.114.010967_FigureS2.pdf [file supp_g3.114.010967_FigureS2.pdf]

a

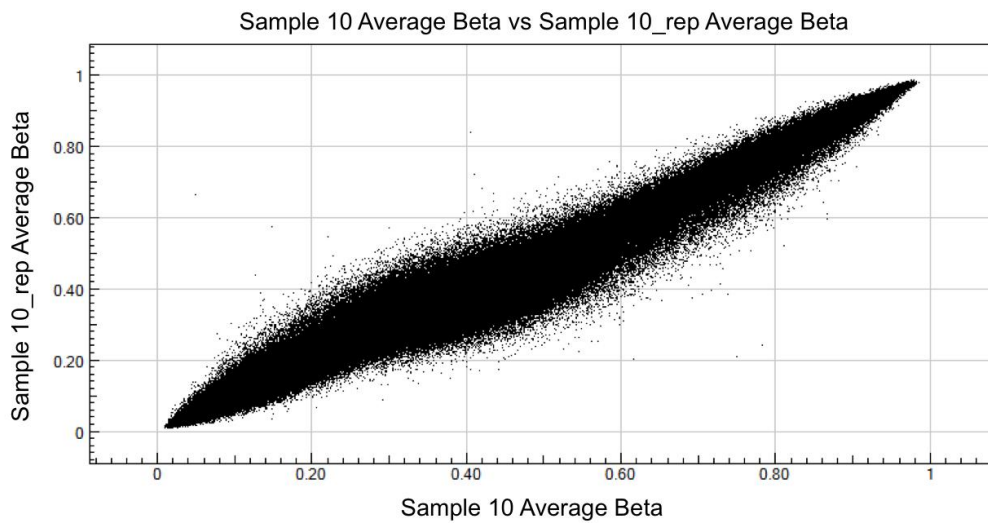

R=0.97

b

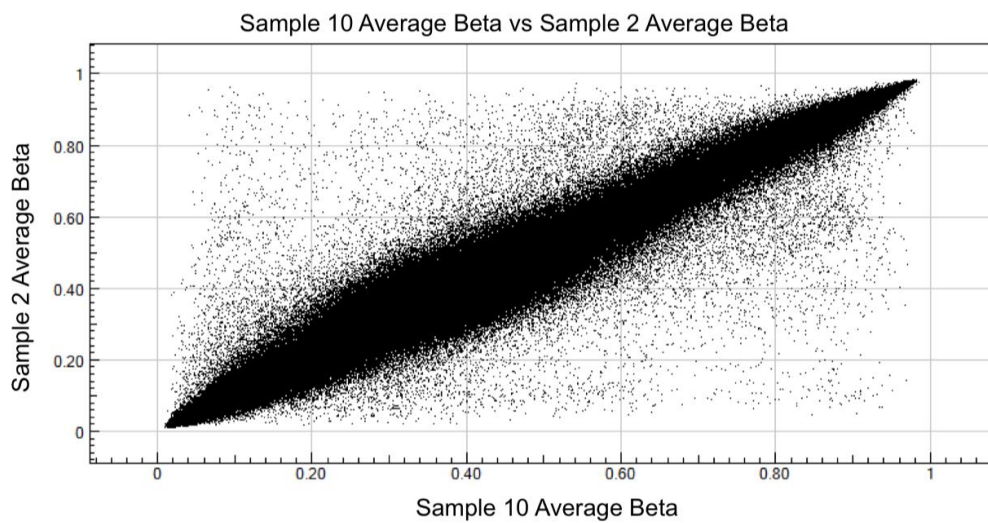

R=0.94

**Figure S2** (a) Scatterplot of Infinium 450K data for *Cynomolgus* macaque muscle sample versus technical replicate of sample. (b) Scatterplot of Infinium 450K data for two independent *Cynomolgus* macaque muscle samples.
