# Supplementary material for: Infinium Monkeys: Infinium 450K Array for the Cynomolgus macaque (Macaca fascicularis)
Source: PubMed Central journal article supplement (PMC4455772; doi:10.1534/g3.114.010967), 2014-05-08
Supplement: supp_g3.114.010967_FigureS3.pdf [file supp_g3.114.010967_FigureS3.pdf]

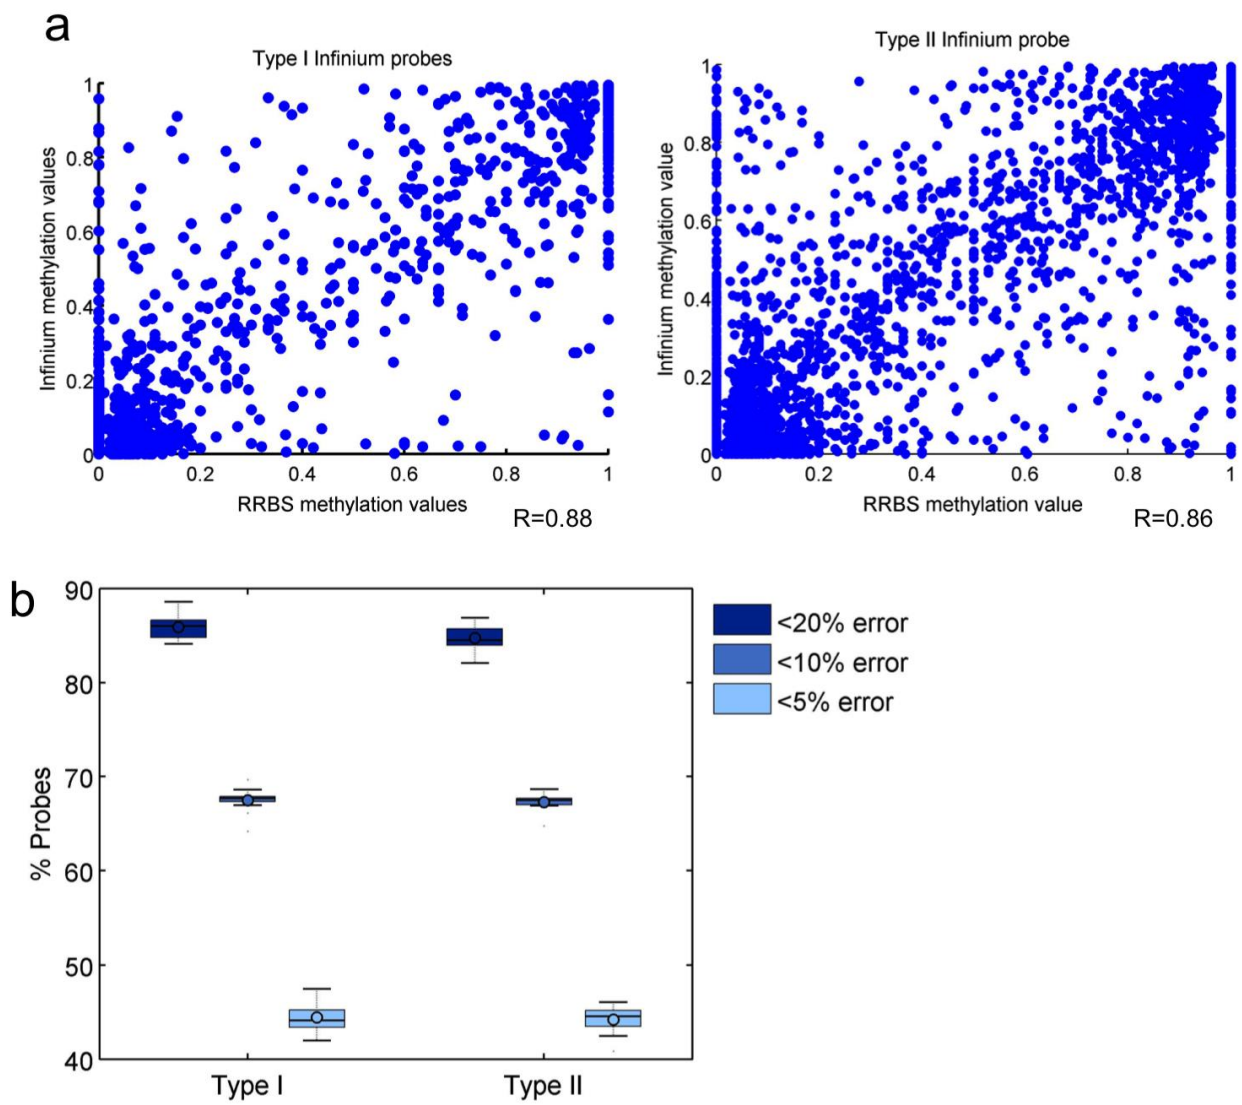

**Figure S3** (a) Scatterplot of Infinium 450K data versus RRBS data for one sample stratified by Infinium type I and type II probes. (b) Percent of probes with varying percent error between RRBS and Infinium data with type I or type II probes.
