# Supplementary material for: Infinium Monkeys: Infinium 450K Array for the Cynomolgus macaque (Macaca fascicularis)
Source: PubMed Central journal article supplement (PMC4455772; doi:10.1534/g3.114.010967), 2014-05-08
Supplement: supp_g3.114.010967_FigureS6.pdf [file supp_g3.114.010967_FigureS6.pdf]

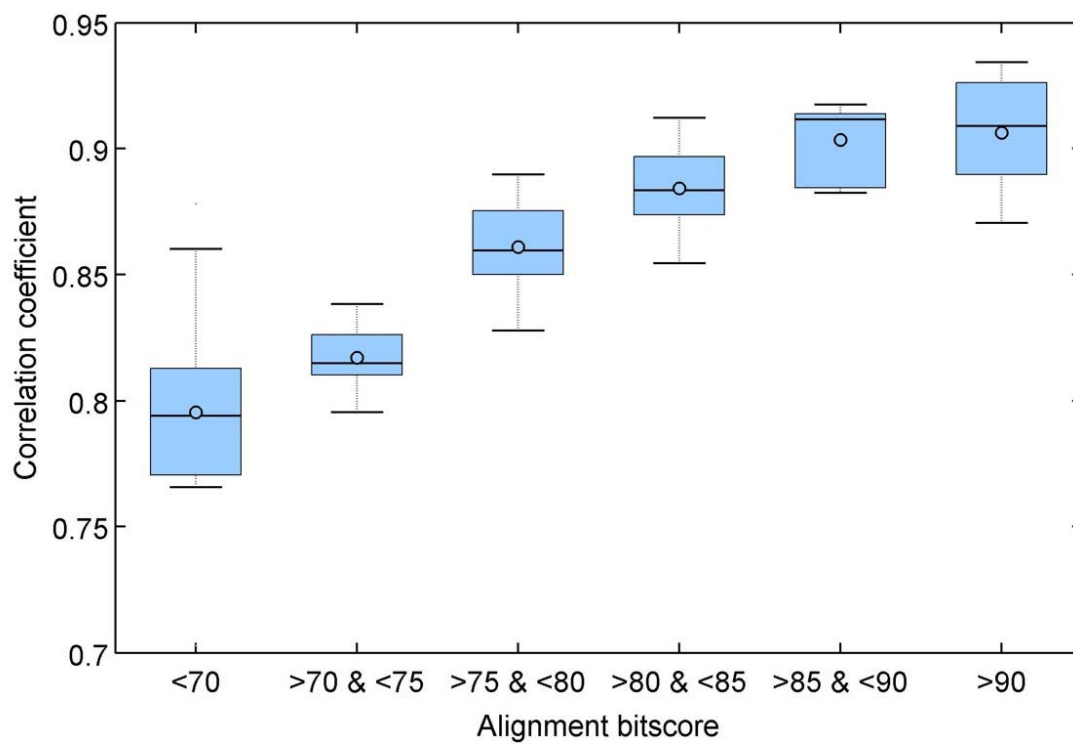

**Figure S6** Correlation of Infinium 450K and RRBS data for selected probes sequences with bitscores in the indicative ranges.
