# Supplementary material for: Infinium Monkeys: Infinium 450K Array for the Cynomolgus macaque (Macaca fascicularis)
Source: PubMed Central journal article supplement (PMC4455772; doi:10.1534/g3.114.010967), 2014-05-08
Supplement: supp_g3.114.010967_FigureS7.pdf [file supp_g3.114.010967_FigureS7.pdf]

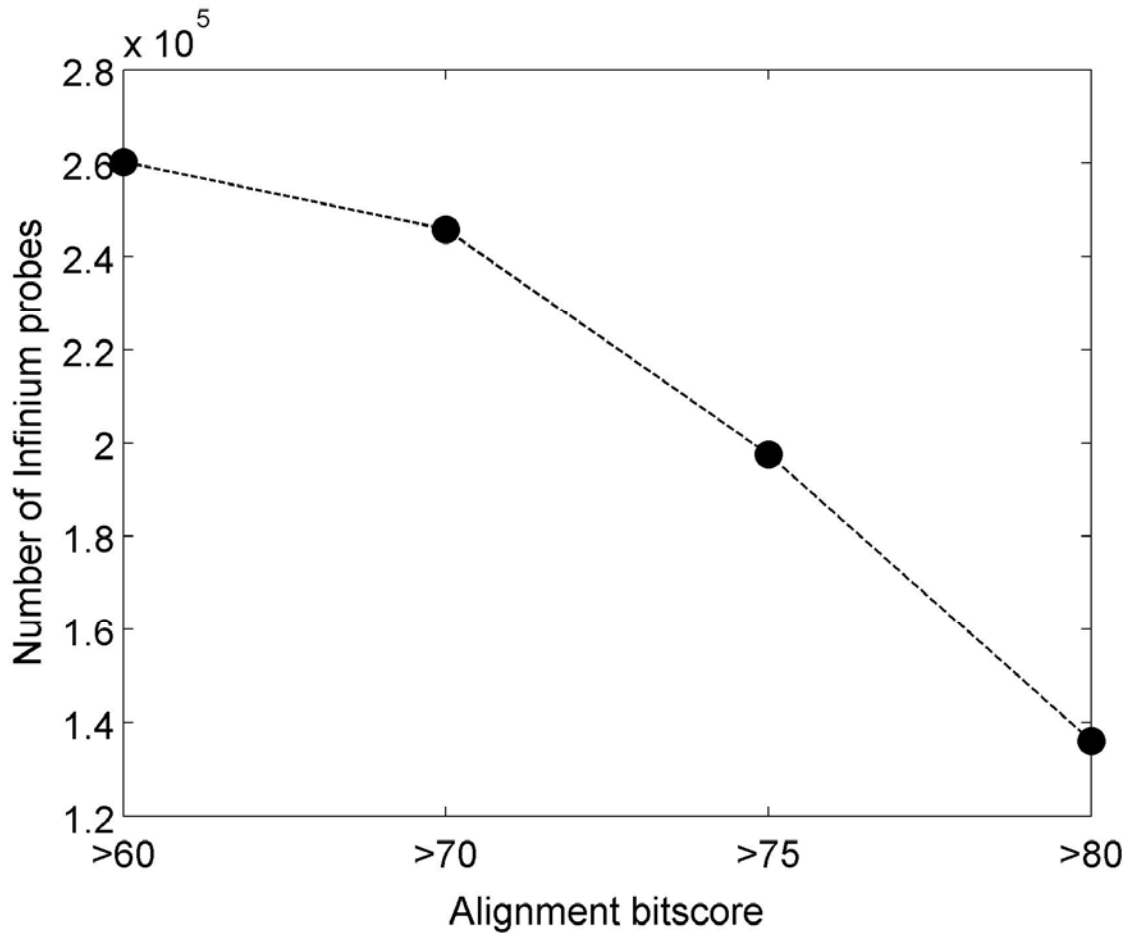

**Figure S7** Number of array probes using different bitscore thresholds.
