# Supplementary material for: Infinium Monkeys: Infinium 450K Array for the Cynomolgus macaque (Macaca fascicularis)
Source: PubMed Central journal article supplement (PMC4455772; doi:10.1534/g3.114.010967), 2014-05-08
Supplement: supp_g3.114.010967_TableS1.pdf [file supp_g3.114.010967_TableS1.pdf]

**Table S1 Per-sample correlation between RRBS and Infinium 450K data and % probes with less than 10% methylation difference between the two technologies stratified across different alignment scores.**

| Alignment score | Sample number       | 1    | 2    | 3    | 4    | 5    | 6    | 7    | 8    | 9    | 10   | 10_rep | 12   |
|-----------------|---------------------|------|------|------|------|------|------|------|------|------|------|--------|------|
| Bit score < 70  | Correlation         | 0.70 | 0.88 | 0.78 | 0.79 | 0.86 | 0.81 | 0.77 | 0.81 | 0.80 | 0.77 | 0.77   | 0.80 |
|                 | % Probes <10% error | 54.7 | 63.6 | 55.7 | 64.0 | 62.1 | 64.5 | 57.8 | 62.5 | 64.3 | 59.2 | 60.0   | 63.9 |
| Bit score > 70  | Correlation         | 0.86 | 0.88 | 0.86 | 0.88 | 0.87 | 0.90 | 0.85 | 0.88 | 0.90 | 0.88 | 0.88   | 0.90 |
|                 | % Probes <10% error | 68.8 | 69.0 | 65.9 | 69.1 | 69.1 | 68.8 | 68.7 | 69.2 | 68.2 | 69.0 | 69.1   | 68.4 |
| Bit score > 80  | Correlation         | 0.88 | 0.90 | 0.88 | 0.91 | 0.88 | 0.92 | 0.88 | 0.90 | 0.92 | 0.90 | 0.90   | 0.92 |
|                 | % Probes <10% error | 70.4 | 69.7 | 66.9 | 70.6 | 70.8 | 70.2 | 71.4 | 70.3 | 69.8 | 70.3 | 71.8   | 69.6 |
