# Supplementary material for: Infinium Monkeys: Infinium 450K Array for the Cynomolgus macaque (Macaca fascicularis)
Source: PubMed Central journal article supplement (PMC4455772; doi:10.1534/g3.114.010967), 2014-05-08
Supplement: supp_g3.114.010967_TableS2.pdf [file supp_g3.114.010967_TableS2.pdf]

**Table S2** Various alignment quality metrics for Type 1 and Type 2 Infinium probes.

| Alignment quality  | Infinium probe |              |
|--------------------|----------------|--------------|
|                    | Type 1         | Type 2       |
| Average % identity | 96.1           | 96.3         |
| Average bitscore   | 81.7           | 81.8         |
| Average E-value    | $3.4e^{-12}$   | $2.6e^{-12}$ |
